# Supplementary material
Source: PubMed Central journal article supplement (PMC3151671)
Supplement: NIHMS309662-supplement-1_si_001.pdf [file NIHMS309662-supplement-1_si_001.pdf]

## Supporting Information

### Pa0148 from *Pseudomonas aeruginosa* Catalyzes the Deamination of Adenine

Alissa M. Goble, Zhening Zhang, J. Michael Sauder, Stephen K. Burley, Subramanyam Swaminathan, and Frank M. Raushel

**Supplementary Information Table S1: Predicted Adenine Deaminases from cog1816.**

| Genus                    | Species                                              | Locus Tag      | GI        |
|--------------------------|------------------------------------------------------|----------------|-----------|
| <i>Acidithiobacillus</i> | <i>ferrooxidans</i> ATCC 23270                       | AFE_0773       | 218666581 |
| <i>Acidithiobacillus</i> | <i>ferrooxidans</i> ATCC 53993                       | Lferr_0916     | 198283050 |
| <i>Acidovorax</i>        | <i>avenae</i> subsp. Citrulli                        | Aave_1138      | 120609828 |
| <i>Acinetobacter</i>     | <i>baumannii</i> AB0057                              | AB57_1219      | 213156180 |
| <i>Acinetobacter</i>     | <i>baumannii</i> ACICU                               | ACICU_01148    | 184157468 |
| <i>Acinetobacter</i>     | <i>baumannii</i> ATCC 17978                          | A1S_1137       | 162286739 |
| <i>Acinetobacter</i>     | <i>baumannii</i> AYE                                 | ABAYE2601      | 169796622 |
| <i>Acinetobacter</i>     | <i>baumannii</i> SDF                                 | ABSDF1427      | 169633127 |
| <i>Acinetobacter</i>     | sp. ADP1                                             | ACIAD1245      | 50084431  |
| <i>Aeromonas</i>         | <i>hydrophila</i> subsp. <i>Hydrophila</i> ATCC 7966 | AHA_2653       | 117621168 |
| <i>Aeromonas</i>         | <i>salmonicida</i> subsp. <i>salmonicida</i> A449    | ASA_2506       | 145299444 |
| <i>Alteromonas</i>       | <i>macleodii</i> 'Deep ecotype'                      | MADE_02509     | 196157310 |
| <i>Arthrobacter</i>      | <i>aurescens</i> TC1                                 | AAur1117       | 119963047 |
| <i>Arthrobacter</i>      | <i>chlorophenolicus</i> A6                           | Achl_0997      | 220911771 |
| <i>Arthrobacter</i>      | sp. FB24                                             | Arth0907       | 116669471 |
| <i>Azoarcus</i>          | sp. BH72                                             | azo0236        | 119896527 |
| <i>Bifidobacterium</i>   | <i>animalis</i> subs. <i>Lactis</i> AD011            | BLA_1473       | 219683948 |
| <i>Bordetella</i>        | <i>avium</i> 197N                                    | BAV0774        | 187477281 |
| <i>Bordetella</i>        | <i>bronchiseptica</i> RB50                           | BB1254         | 33600240  |
| <i>Bordetella</i>        | <i>petrii</i> DSM 12804                              | Bpet3978       | 163858294 |
| <i>Bordetella</i>        | <i>parapertussis</i> 12822                           | BPP1038        | 33595716  |
| <i>Burkholderia</i>      | <i>ambifaria</i> AMMD                                | Bamb_0883      | 115350937 |
| <i>Burkholderia</i>      | <i>ambifaria</i> MC40-6                              | BamMC406_0895  | 172059950 |
| <i>Burkholderia</i>      | <i>cenoepecia</i> AU 1054                            | Bcen_0541      | 107022098 |
| <i>Burkholderia</i>      | <i>cenoepecia</i> HI2424                             | Bcen2424_1020  | 116689043 |
| <i>Burkholderia</i>      | <i>cenoepecia</i> J2315                              | BCAL2989       | 206561334 |
| <i>Burkholderia</i>      | <i>cenoepecia</i> MC0-3                              | Bcenmc03_0978  | 170732330 |
| <i>Burkholderia</i>      | <i>mallei</i> ATCC 23344                             | BMA0461        | 53725191  |
| <i>Burkholderia</i>      | <i>mallei</i> NCTC 10247                             | BMA10247_0168  | 126449325 |
| <i>Burkholderia</i>      | <i>mallei</i> SAVP1                                  | BMASAVP1_A2607 | 121600394 |
| <i>Burkholderia</i>      | <i>multivorans</i> ATCC 17616 chromosome 3           | BMULJ_00865    | 189349726 |
| <i>Burkholderia</i>      | <i>multivorans</i> ATCC 17616 chromosome 2           | Bmul_2376      | 161525546 |

|                          |                                                               |                 |           |
|--------------------------|---------------------------------------------------------------|-----------------|-----------|
| <i>Burkholderia</i>      | <i>phydatum</i> STM815 chromosome 1                           | Bphy_0710       | 186475475 |
| <i>Burkholderia</i>      | <i>phytofirmans</i> PsJN chromosome 1                         | Bphyt_3044      | 187925018 |
| <i>Burkholderia</i>      | <i>pseudomallei</i>                                           | BPSL2539        | 53720149  |
| <i>Burkholderia</i>      | <i>pseudomallei</i> 1106a chromosome I                        | BUPRS1106A_2976 | 126455345 |
| <i>Burkholderia</i>      | <i>pseudomallei</i> 668                                       | BURPS668_2916   | 126439627 |
| <i>Burkholderia</i>      | sp. 383                                                       | Bcep18194_A4131 | 78065603  |
| <i>Burkholderia</i>      | <i>thailandensis</i> E264                                     | BTH_I1612       | 83721046  |
| <i>Burkholderia</i>      | <i>vietnamiensis</i> G4                                       | Bcep1808_0939   | 134295050 |
| <i>Burkholderia</i>      | <i>xenovorans</i> LB416                                       | Bxe_A0947       | 91784845  |
| <i>Caldivirga</i>        | <i>maquilingensis</i> IC-167                                  | Cmaq1623        | 159042184 |
| <i>Campylobacter</i>     | <i>lari</i> RM1200                                            | Cla_0004        | 222823050 |
| <i>Caulobacter</i>       | <i>crecenscentus</i> CB15                                     | CC3180          | 16127410  |
| <i>Caulobacter</i>       | <i>crecenscentus</i> NA1000                                   | CCNA_03284      | 221236219 |
| <i>Caulobacter</i>       | sp. K31                                                       | Caul_0816       | 167644782 |
| <i>Cellvibrio</i>        | <i>japonicus</i> Ueda 107                                     | CJA_0578        | 192359911 |
| <i>Chlorobium</i>        | <i>phaeobacteroides</i> BS1                                   | Cphamn1_1745    | 189500674 |
| <i>Chlorobium</i>        | <i>phaeobacteroides</i> DSM 266                               | Cpha266_1916    | 119357712 |
| <i>Chromohalobacter</i>  | <i>salexigens</i> DSM 3043                                    | Csal_1983       | 92114106  |
| <i>Clavibacter</i>       | <i>michiganensis</i> subsp. <i>michiganensis</i><br>NCPPB 382 | CMM_0659        | 148271838 |
| <i>Colwellia</i>         | <i>psychrerythraea</i> 34H                                    | CPS_1359        | 71279112  |
| <i>Cupriavidus</i>       | <i>taiwanensis</i>                                            | RALTA_A0998     | 194289123 |
| <i>Cyanothece</i>        | sp. ATCC 51142                                                | cce_0747        | 172035663 |
| <i>Delftia</i>           | <i>acidovorans</i> SPH-1                                      | Daci_2144       | 160897587 |
| <i>Diaphorobacter</i>    | sp. TPSY                                                      | Dtpsy_2442      | 222111614 |
| Environmental            | sequence                                                      |                 | 44348236  |
| <i>Francisella</i>       | <i>tularensis</i> subsp. <i>tularensis</i> FSC198             | FTF0939c        | 110670507 |
| <i>Francisella</i>       | <i>tularensis</i> subsp. <i>tularensis</i> SCHU S4            | FTT0939c        | 56708036  |
| <i>Francisella</i>       | <i>tularensis</i> subsp. <i>tularensis</i> WV96-3418          | FTW_0833        | 134301850 |
| <i>Geobacter</i>         | <i>lovleyi</i> SZ                                             | Glov_1001       | 189424067 |
| <i>Geobacter</i>         | <i>uraniireducens</i> Rf4                                     | Gura_2399       | 148264445 |
| <i>Hahella</i>           | <i>chejuensis</i> KCTC 2396                                   | HCH_01503       | 83644351  |
| <i>Hyphomonas</i>        | <i>neptunium</i> ATCC 15444                                   | HNE_1938        | 114797828 |
| <i>Janthinobacterium</i> | sp. Marseille                                                 | mma_1581        | 152980106 |
| <i>Leifsonia</i>         | <i>xyli</i> subsp. <i>xyli</i> str. CTCB07                    | Lxx13430        | 50954990  |
| <i>Leptothrix</i>        | <i>cholodnii</i> SP-6                                         | Lcho_3742       | 171060412 |
| <i>Maricaulis</i>        | <i>maris</i> MCS10                                            | Mmar101236      | 114569787 |
| <i>Marinomonas</i>       | sp. MWYL1                                                     | Mmwy111922      | 152995946 |
| <i>Methylibium</i>       | <i>petroleiphilum</i> PM1                                     | MpeA0809        | 124266002 |
| <i>Pelodictyon</i>       | <i>luteolum</i> DSM 273                                       | Plut1524        | 78187381  |
| <i>Phenylobacterium</i>  | <i>zucineum</i> HLK1                                          | PHZ_c3010       | 197106471 |
| <i>Photobacterium</i>    | <i>profundum</i> SS9                                          | PBPRB1184       | 54302863  |
| <i>Photobacterium</i>    | <i>profundum</i> SS9                                          | PBPRB1379       | 54303053  |
| <i>Polaromonas</i>       | <i>naphthalenivorans</i> CJ2                                  | Pnap1040        | 121603949 |
| <i>Polaromonas</i>       | sp. JS666                                                     | Bpro1487        | 91787381  |

|                          |                                                 |               |           |
|--------------------------|-------------------------------------------------|---------------|-----------|
| <i>Pseudoalteromonas</i> | <i>atlantica</i> T6c                            | Patl2420      | 109898735 |
| <i>Pseudomonas</i>       | <i>aeruginosa</i> LESB58                        | PLES_01491    | 218888893 |
| <i>Pseudomonas</i>       | <i>aeruginosa</i> PA7                           | PSPA70226     | 152986046 |
| <i>Pseudomonas</i>       | <i>aeruginosa</i> PAO1                          | PA0148        | 15595346  |
| <i>Pseudomonas</i>       | <i>aeruginosa</i> UCBPP-PA14                    | PA1401830     | 116053869 |
| <i>Pseudomonas</i>       | <i>fluorescens</i> Pf-5                         | PFL0719       | 70734221  |
| <i>Pseudomonas</i>       | <i>fluorescens</i> PfO-1                        | Pflu010671    | 77456899  |
| <i>Pseudomonas</i>       | <i>mendocina</i> ymp                            | Pmen3706      | 146308721 |
| <i>Pseudomonas</i>       | <i>putida</i> F1                                | Pput0631      | 148545881 |
| <i>Pseudomonas</i>       | <i>putida</i> GB-1                              | PputGB10636   | 167031652 |
| <i>Pseudomonas</i>       | <i>putida</i> KT2440                            | PP0591        | 26987329  |
| <i>Pseudomonas</i>       | <i>putida</i> W619                              | PputW619_4572 | 170723733 |
| <i>Pseudomonas</i>       | <i>syringae</i> pv. <i>phaseolicola</i> 1448A   | PSPPH4636     | 71735362  |
| <i>Pseudomonas</i>       | <i>syringae</i> pv. <i>syringae</i> B728a       | Psyr0661      | 66043928  |
| <i>Pseudomonas</i>       | <i>syringae</i> tomato DC3000                   | PSPTO0757     | 28867985  |
| <i>Pseudomonas</i>       | <i>entomophila</i> L48                          | PSEEN0674     | 104779927 |
| <i>Psychrobacter</i>     | <i>cryohalolentis</i> K5                        | Pcryo0456     | 93005286  |
| <i>Psychromonas</i>      | <i>ingrahamii</i> 37                            | Ping0692      | 119944464 |
| <i>Ralstonia</i>         | <i>eutropha</i> JMP134                          | Reut_A2428    | 73542114  |
| <i>Ralstonia</i>         | <i>metallidurans</i> CH34                       | Rmet_0890     | 94309835  |
| <i>Ralstonia</i>         | <i>pickettii</i> 12J                            | Rpic_2249     | 187929328 |
| <i>Ralstonia</i>         | <i>solanacearum</i> GMI1000                     | RSc2098       | 17546817  |
| <i>Rhodococcus</i>       | <i>erythropolis</i> PR4                         | RER_41080     | 226307595 |
| <i>Rhodococcus</i>       | <i>opacus</i> B4                                | ROP_60860     | 226365495 |
| <i>Rhodococcus</i>       | sp. RHA1                                        | RHA1ro06027   | 111022990 |
| <i>Rhodoferax</i>        | <i>ferrireducens</i> T118                       | Rfer3297      | 89902066  |
| <i>Rhodospirillum</i>    | <i>rubrum</i> ATCC 11170                        | RruA0766      | 83592105  |
| <i>Saccharopolyspora</i> | <i>erythraea</i> NRRL 2338                      | SACE1513      | 134098099 |
| <i>Shewanella</i>        | <i>sediminis</i> HAW-EB3                        | Ssed2715      | 157375850 |
| <i>Sphigomonas</i>       | <i>wittichii</i> RW1                            | Swit2485      | 148555400 |
| <i>Sphingopyxis</i>      | <i>alaskensis</i> RB2256                        | Sala2009      | 103487492 |
| <i>Streptomyces</i>      | <i>avermitilis</i> MA-4680                      | SAV5577       | 29832120  |
| <i>Streptomyces</i>      | <i>coelicolor</i> A3(2)                         | SCO2546       | 21221005  |
| <i>Streptomyces</i>      | <i>griseus</i> subsp. <i>griseus</i> NBRC 13358 | SGR_4999      | 182438792 |
| <i>Verminophrobacter</i> | <i>eiseniae</i> EF01-2                          | Veis1083      | 121608070 |
| <i>Vibrio</i>            | <i>harveyi</i> ATCC BAA-1122                    | VIBHAR_06421  | 156977633 |
| <i>Vibrio</i>            | <i>parahaemolyticus</i> RIMD 2210633            | VPA1292       | 28901147  |
| <i>Wolinella</i>         | <i>succinogenes</i> DSM 1740                    | WS0737        | 34557141  |
| <i>Zymomonas</i>         | <i>mobilis</i> subsp. <i>mobilis</i> ZM4        | ZMO0971       | 56551867  |
